# Supplementary material for: Insights into the Genes Involved in ABA Biosynthesis and Perception during Development and Ripening of the Chilean Strawberry Fruit
Source: MDPI journal article supplement (doi:10.3390/ijms24108531), 2023-05-10
Supplement: s1 [file s1]

## SUPPLEMENTARY MATERIAL

**Table S1.** List of protein sequences employed in the phylogenetic analyses of *PYR/PYL*, including GenBank accession numbers.

| Species                         | Id                | GeneBank       |
|---------------------------------|-------------------|----------------|
| <i>Fragaria x ananassa</i> (Fa) | <i>PYR1</i>       | ADZ55282.1     |
|                                 | <i>PYR1-like</i>  | XP_008341960.1 |
| <i>Malus domestica</i> (Md)     | <i>PYL2</i>       | XP_008377517.1 |
|                                 | <i>PYL4-like</i>  | XP_008370174.2 |
|                                 | <i>PYL8</i>       | XP_008380616.1 |
|                                 | <i>PYL12-like</i> | XP_008371472.1 |
| <i>Prunus persica</i> (Pp)      | <i>PYR1</i>       | XP_007209595.1 |
|                                 | <i>PYL2</i>       | XP_007225598.2 |
|                                 | <i>PYL4</i>       | XP_020421077.1 |
|                                 | <i>PYL8</i>       | XP_007218467.1 |
|                                 | <i>PYL9</i>       | XP_007218488.1 |
|                                 | <i>PYL12</i>      | XP_007213534.2 |
| <i>Rosa chinensis</i> (Rc)      | <i>PYR1</i>       | XP_024172755.1 |
|                                 | <i>PYL2</i>       | XP_024167402.1 |
|                                 | <i>PYL4</i>       | XP_024189542.1 |
|                                 | <i>PYL8</i>       | XP_024177069.1 |
|                                 | <i>PYL12</i>      | XP_024160584.1 |
| <i>Fragaria vesca</i> (Fv)      | <i>PYR1</i>       | XP_004300241.1 |
|                                 | <i>PYL2</i>       | XP_004291031.1 |
|                                 | <i>PYL4</i>       | XP_004302017.1 |
|                                 | <i>PYL8</i>       | XP_011470277.1 |
|                                 | <i>PYL9</i>       | XP_004306686.1 |
|                                 | <i>PYL12</i>      | XP_004293952.1 |

**Table S2.** List of protein sequences employed in the phylogenetic analyses of *NCED/CCD*, including GenBank accession numbers.

| Species                          | Id           | GeneBank       |
|----------------------------------|--------------|----------------|
| <i>Fragaria x ananassa</i> (Fa)  | <i>NCED1</i> | XP_004293530.1 |
|                                  | <i>NCED2</i> | AFU61915.1     |
|                                  | <i>NCED3</i> | AFU61916.1     |
| <i>Malus domestica</i> (Md)      | <i>NCED1</i> | XP_008382970.1 |
|                                  | <i>NCED2</i> | XP_008371764.2 |
|                                  | <i>CCD1</i>  | XP_008375177.3 |
|                                  | <i>CCD4</i>  | XP_008340019.2 |
| <i>Prunus avium</i> (Pa)         | <i>CCD4</i>  | XP_021809777.1 |
| <i>Rosa chinensis</i> (Rc)       | <i>NCED1</i> | XP_024156554.1 |
| <i>Rosa rugosa</i> (Rr)          | <i>CCD1</i>  | AKT74334.1     |
|                                  | <i>CCD4</i>  | AKT74335.1     |
| <i>Fragaria vesca</i> (Fv)       | <i>NCED1</i> | XP_004293530.1 |
|                                  | <i>NCED3</i> | XP_004300667.1 |
|                                  | <i>NCED6</i> | XP_004289731.2 |
|                                  | <i>CCD1</i>  | XP_004306539.2 |
|                                  | <i>CCD4</i>  | XP_004297644.1 |
| <i>Arabidopsis thaliana</i> (At) | <i>NCED2</i> | NP_193569.1    |
|                                  | <i>NCED3</i> | NP_188062.1    |
|                                  | <i>NCED4</i> | NP_193652.1    |
|                                  | <i>NCED5</i> | NP_174302.1    |
|                                  | <i>CCD1</i>  | NP_191911.1    |
